# Supplementary material for: Dissociation between iron accumulation and ferritin upregulation in the aged substantia nigra: attenuation by dietary restriction
Source: publisher site journal article supplement (doi:10.18632/aging.101069), 2016-10-12
Supplement: Supplementary file 1 [file aging-v8i10-101069-supplementary-material-SD1.pdf]

## SUPPLEMENTARY MATERIAL

**Supplemental Table 1.** R1, R2 and R2\* relaxation rates; synchrotron radiation-based X-ray fluorescence measured iron; ferritin, GFAP and iba1 immunopositive cell counts in the striatum, globus pallidus and substantia nigra; and striatal volumes in C57Bl/6 mice aged 2, 6, 13, 19 and 27 months. Values are mean  $\pm$  SEM values.

| Measurement                                                                            | Brain region     | Age                 |                     |                     |                     |                     |
|----------------------------------------------------------------------------------------|------------------|---------------------|---------------------|---------------------|---------------------|---------------------|
|                                                                                        |                  | 2 month             | 6 month             | 13 month            | 19 month            | 27 month            |
| <i>R1 relaxation rate</i>                                                              | Striatum         | 0.67 $\pm$ 0.01     | 0.70 $\pm$ 0.01     | 0.69 $\pm$ 0.02     | 0.69 $\pm$ 0.01     | 0.73 $\pm$ 0.01     |
|                                                                                        | Globus Pallidus  | 0.70 $\pm$ 0.01     | 0.75 $\pm$ 0.01     | 0.76 $\pm$ 0.01     | 0.78 $\pm$ 0.01     | 0.82 $\pm$ 0.01     |
|                                                                                        | Substantia Nigra | 0.65 $\pm$ 0.01     | 0.69 $\pm$ 0.01     | 0.69 $\pm$ 0.01     | 0.71 $\pm$ 0.01     | 0.72 $\pm$ 0.01     |
| <i>R2 relaxation rate</i>                                                              | Striatum         | 19.3 $\pm$ 0.18     | 20.5 $\pm$ 0.20     | 19.8 $\pm$ 0.12     | 20.8 $\pm$ 0.13     | 21.2 $\pm$ 0.17     |
|                                                                                        | Globus Pallidus  | 20.7 $\pm$ 0.22     | 22.5 $\pm$ 0.21     | 22.6 $\pm$ 0.16     | 24.9 $\pm$ 0.23     | 24.8 $\pm$ 0.55     |
|                                                                                        | Substantia Nigra | 17.3 $\pm$ 0.42     | 20.1 $\pm$ 0.33     | 19.8 $\pm$ 0.33     | 21.7 $\pm$ 0.37     | 22.0 $\pm$ 0.80     |
| <i>R2* relaxation rate</i>                                                             | Striatum         | 25.4 $\pm$ 0.28     | 26.7 $\pm$ 0.62     | 28.0 $\pm$ 0.18     | 29.6 $\pm$ 0.32     | 32.3 $\pm$ 0.96     |
|                                                                                        | Globus Pallidus  | 29.5 $\pm$ 0.43     | 32.1 $\pm$ 0.34     | 38.6 $\pm$ 0.53     | 44.8 $\pm$ 0.52     | 50.2 $\pm$ 1.41     |
|                                                                                        | Substantia Nigra | 24.7 $\pm$ 0.67     | 31.4 $\pm$ 1.01     | 32.5 $\pm$ 1.10     | 37.0 $\pm$ 0.82     | 38.8 $\pm$ 1.34     |
| <i>Synchrotron radiation-based X-ray Fluorescence measured iron (wet weight mg/kg)</i> | Striatum         | 19.3 $\pm$ 0.78     | 23.2 $\pm$ 2.31     | Not measured        | 35.2 $\pm$ 1.76     | 36.9 $\pm$ 1.85     |
|                                                                                        | Globus Pallidus  | 23.1 $\pm$ 1.31     | 27.5 $\pm$ 1.28     | Not measured        | 71.5 $\pm$ 7.63     | 94.1 $\pm$ 8.86     |
|                                                                                        | Substantia Nigra | 20.0 $\pm$ 1.44     | 29.7 $\pm$ 1.96     | Not measured        | 60.2 $\pm$ 8.43     | 66.9 $\pm$ 13.2     |
| <i>Ferritin (10<sup>4</sup> cell counts/<math>\mu</math>m<sup>2</sup>)</i>             | Striatum         | 3.4 $\pm$ 0.1       | 4.1 $\pm$ 0.1       | Not measured        | 5.8 $\pm$ 0.2       | 5.9 $\pm$ 0.2       |
|                                                                                        | Globus Pallidus  | 4.8 $\pm$ 0.3       | 6.0 $\pm$ 0.4       | Not measured        | 8.8 $\pm$ 0.3       | 9.5 $\pm$ 0.1       |
|                                                                                        | Substantia Nigra | 4.9 $\pm$ 0.2       | 5.6 $\pm$ 0.3       | Not measured        | 4.2 $\pm$ 0.3       | 4.3 $\pm$ 0.1       |
| <i>GFAP (10<sup>5</sup> cell counts/<math>\mu</math>m<sup>2</sup>)</i>                 | Striatum         | 5.0 $\pm$ 0.7       | 8.0 $\pm$ 0.6       | Not measured        | 17.5 $\pm$ 0.3      | 31.2 $\pm$ 0.5      |
|                                                                                        | Globus Pallidus  | 54.0 $\pm$ 13.0     | 66.8 $\pm$ 6.91     | Not measured        | 68.1 $\pm$ 10.3     | 104.7 $\pm$ 12.0    |
|                                                                                        | Substantia Nigra | 49.3 $\pm$ 2.0      | 41.3 $\pm$ 2.8      | Not measured        | 55.6 $\pm$ 3.0      | 53.8 $\pm$ 2.8      |
| <i>Iba1 (10<sup>5</sup> cell counts/<math>\mu</math>m<sup>2</sup>)</i>                 | Striatum         | 18.2 $\pm$ 2.2      | 19.3 $\pm$ 0.5      | Not measured        | 22.0 $\pm$ 0.6      | 24.9 $\pm$ 2.0      |
|                                                                                        | Globus Pallidus  | 30.7 $\pm$ 0.6      | 28.3 $\pm$ 1.3      | Not measured        | 33.1 $\pm$ 2.7      | 38.5 $\pm$ 0.7      |
|                                                                                        | Substantia Nigra | 30.0 $\pm$ 1.3      | 25.1 $\pm$ 1.9      | Not measured        | 31.1 $\pm$ 1.7      | 35.0 $\pm$ 0.7      |
| <i>Normalized volume (mm<sup>3</sup>)</i>                                              | Striatum         | 0.0429 $\pm$ 0.0005 | 0.0406 $\pm$ 0.0006 | 0.0387 $\pm$ 0.0010 | 0.0383 $\pm$ 0.0003 | 0.0376 $\pm$ 0.0008 |

**Supplemental Table 2.** Guidelines for delineation of basal ganglia ROIs for MRI and SR-XRF data analysis.

| Brain region            | Approximate bregma (mm) | Description                                                                                                                                                                                                                                                                        |
|-------------------------|-------------------------|------------------------------------------------------------------------------------------------------------------------------------------------------------------------------------------------------------------------------------------------------------------------------------|
| <b>Striatum</b>         | +0.62                   | Elliptical ROI placed under the corpus callosum close to, but ensuring not in the lateral ventricles                                                                                                                                                                               |
| <b>Globus Pallidus</b>  | -0.34/-0.46             | Elliptical ROI, with the right edge lined up with the lateral ventricles and left edge delineated by the contrast difference between the striatum and globus pallidus. Height defined by the space between the 3 <sup>rd</sup> dorsal ventricle and the 3 <sup>rd</sup> ventricle. |
| <b>Substantia Nigra</b> | -3.28                   | Small elliptical ROI placed alongside the visible cerebral peduncle at the base of the ventral hippocampus.                                                                                                                                                                        |

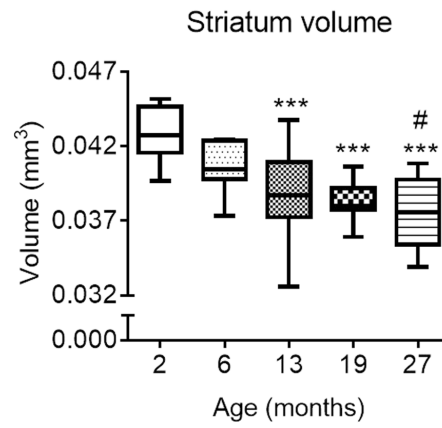

**Supplemental Figure 1.** Normalized striatal volumes decrease steadily with advancing age. Significance level at \*\*\*,  $P < 0.001$ , compared to 2 month and #,  $P < 0.05$  compared to 6 months, respectively.
